# Supplementary material for: Associations between serotonin transporter gene polymorphisms and heat pain perception in adults with chronic pain
Source: PubMed Central journal article supplement (PMC3737051; doi:10.1186/1471-2350-14-78), 2013-07-30
Supplement: 1471-2350-14-78-S2.pdf [file 1471-2350-14-78-S2.pdf]

**Table 1.** Demographic and clinical characteristics of study participants.

| Characteristic                                                | 5-HTTLPR Genotype  |                             |                           |                            |
|---------------------------------------------------------------|--------------------|-----------------------------|---------------------------|----------------------------|
|                                                               | Total<br>(n = 277) | High Expressing<br>(n = 61) | Intermediate<br>(n = 149) | Low Expressing<br>(n = 67) |
| Age, years, <i>mean</i> ± <i>SD</i>                           | 45.5 ± 13.2        | 46.7 ± 12.7                 | 45.6 ± 13.3               | 44.3 ± 13.4                |
| Sex, <i>No. female</i> (%)                                    | 185 (67)           | 44 (72)                     | 98 (66)                   | 43 (64)                    |
| Ethnicity                                                     |                    |                             |                           |                            |
| Caucasian <i>No. (%)</i>                                      | 263 (95)           | 57 (93)                     | 145 (97)                  | 61 (91)                    |
| African American                                              | 2 (< 1)            | 0                           | 2 (1)                     | 0                          |
| Asian                                                         | 2 (< 1)            | 0                           | 0                         | 2 (3)                      |
| AI/AN                                                         | 3 (1)              | 1 (2)                       | 2 (1)                     | 0                          |
| Pacific Islander                                              | 2 (<1)             | 0                           | 0                         | 2 (3)                      |
| Hispanic                                                      | 5 (2)              | 3 (5)                       | 0                         | 2 (3)                      |
| Marital status, <i>No. married</i> (%)                        | 175 (63)           | 38 (62)                     | 95 (64)                   | 42 (63)                    |
| Education, years, <i>mean</i> ± <i>SD</i>                     | 15.0 ± 2.9         | 14.6 ± 2.7                  | 15.3 ± 3.0                | 14.8 ± 2.7                 |
| Pain duration, years, <i>mean</i> ± <i>SD</i>                 | 9.3 ± 8.3          | 8.4 ± 8.9                   | 9.7 ± 7.9                 | 9.2 ± 8.6                  |
| BMI (kg/m <sup>2</sup> ), <i>mean</i> ± <i>SD</i>             | 29.2 ± 6.9         | 28.9 ± 8.0                  | 29.3 ± 6.3                | 29.4 ± 7.3                 |
| Current employment, <i>yes</i> (%)                            | 85 (31)            | 16 (26)                     | 48 (32)                   | 21 (31)                    |
| Primary pain diagnosis                                        |                    |                             |                           |                            |
| Low back pain, <i>No. (%)</i>                                 | 62 (22)            | 9 (15)                      | 32 (21)                   | 21 (31)                    |
| Fibromyalgia                                                  | 60 (23)            | 13 (21)                     | 32 (21)                   | 15 (22)                    |
| Abdominal                                                     | 21 (8)             | 9 (15)                      | 8 (5)                     | 4 (6)                      |
| Generalized                                                   | 37 (13)            | 7 (11)                      | 23 (15)                   | 7 (10)                     |
| Chronic headache                                              | 28 (10)            | 4 (7)                       | 18 (12)                   | 6 (9)                      |
| Pelvic                                                        | 10 (4)             | 2 (3)                       | 7 (5)                     | 1 (2)                      |
| Lower extremity                                               | 15 (5)             | 4 (6)                       | 7 (5)                     | 4 (6)                      |
| Facial                                                        | 5 (2)              | 1 (2)                       | 3 (2)                     | 1 (2)                      |
| Neck                                                          | 21 (7)             | 8 (13)                      | 11 (7)                    | 2 (3)                      |
| Upper extremity                                               | 13 (5)             | 3 (5)                       | 7 (5)                     | 3 (4)                      |
| Chest wall                                                    | 3 (1)              | 0                           | 1 (<1)                    | 2 (3)                      |
| Other                                                         | 2 (< 1)            | 1 (2)                       | 0                         | 1 (2)                      |
| Opioid use, <i>yes</i> (%)                                    | 143 (52)           | 28 (46)                     | 80 (54)                   | 35 (52)                    |
| Morphine equivalent dose<br>(mg/day), <i>mean</i> ± <i>SD</i> | 46.1 ± 77.9        | 43.3 ± 82.2                 | 50.9 ± 85.6               | 38.1 ± 51.5                |
| Smoking status, <i>yes</i> (%)                                | 51 (18)            | 12 (20)                     | 25 (17)                   | 14 (21)                    |
| Pain severity*                                                | 51.0 ± 7.1         | 50.3 ± 7.4                  | 51.0 ± 7.1                | 51.4 ± 6.7                 |

\*pain severity subscale of the Multidimensional Pain Inventory.
